# Supplementary material for: Characterising a homozygous two‐exon deletion in UQCRH: comparing human and mouse phenotypes
Source: PubMed Central journal article supplement (PMC8649870; doi:10.15252/emmm.202114397), 2021-11-08
Supplement: EMMM-13-e14397-s001.pdf [file EMMM-13-e14397-s001.pdf]

# Source Data Figure 3C

Colourimetric image to show MW marker (kDa)

Merged image

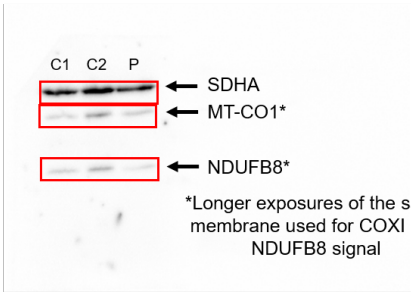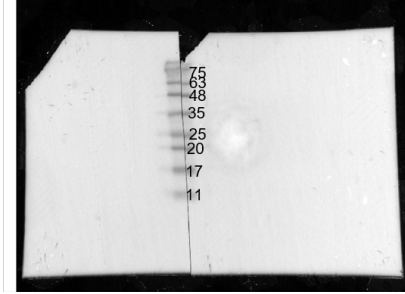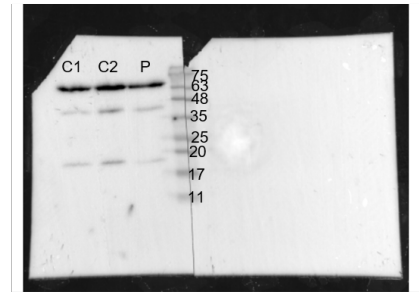

Colourimetric image to show MW marker (kDa)

Merged image

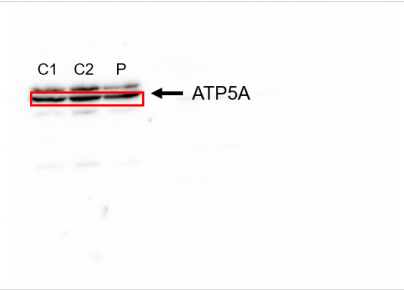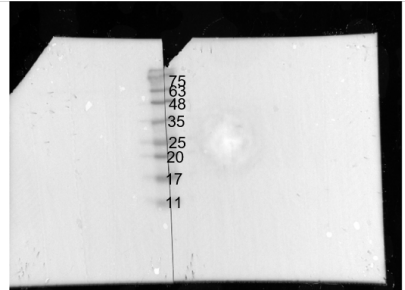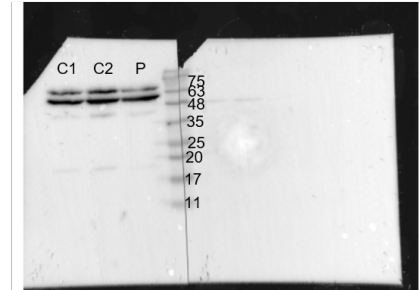

Colourimetric image to show MW marker (kDa)

Merged image

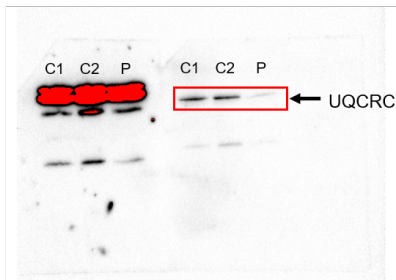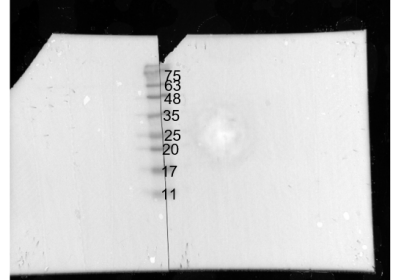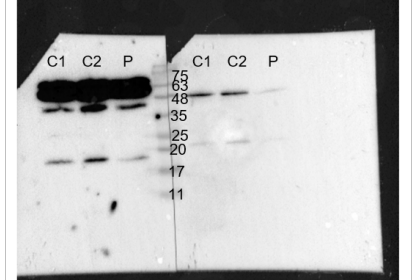

Colourimetric image to show MW marker (kDa)

Merged image

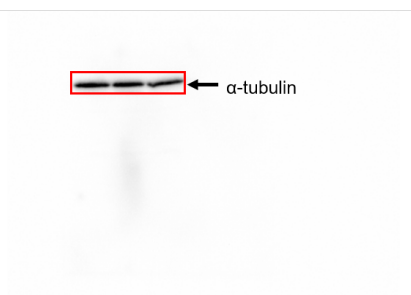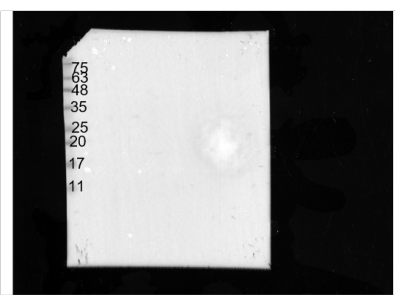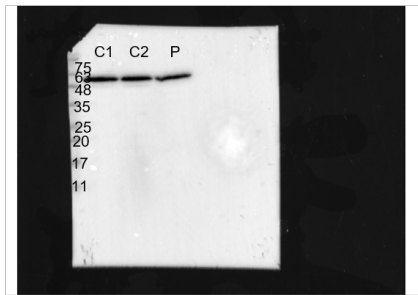

# Source Data Figure 3D

Anti-UQCRC2

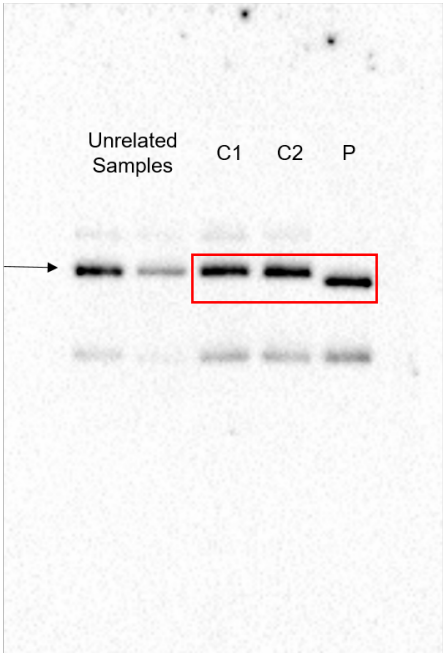

+Anti-NDUFB8

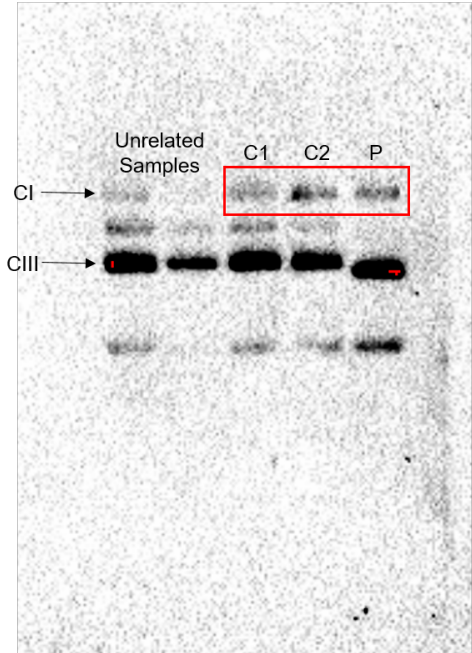

+Anti-ATP5A

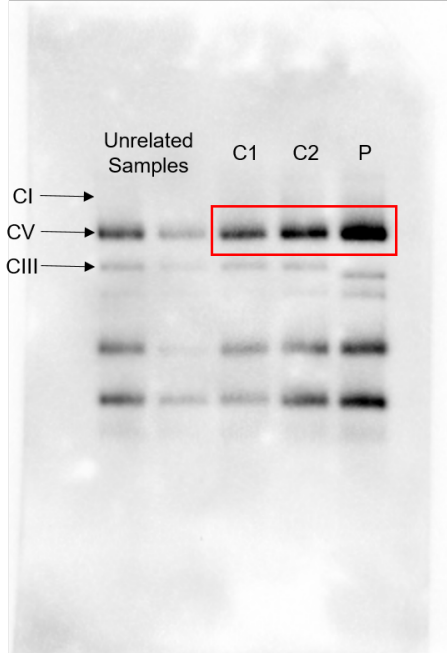

+Anti-SDHA

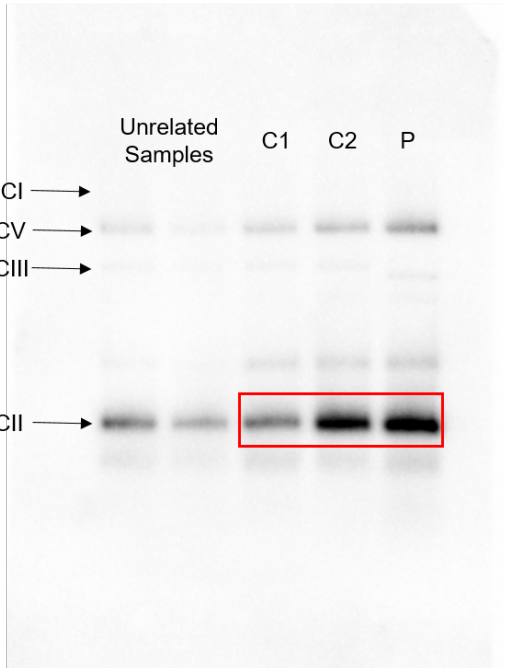

Anti-COXI

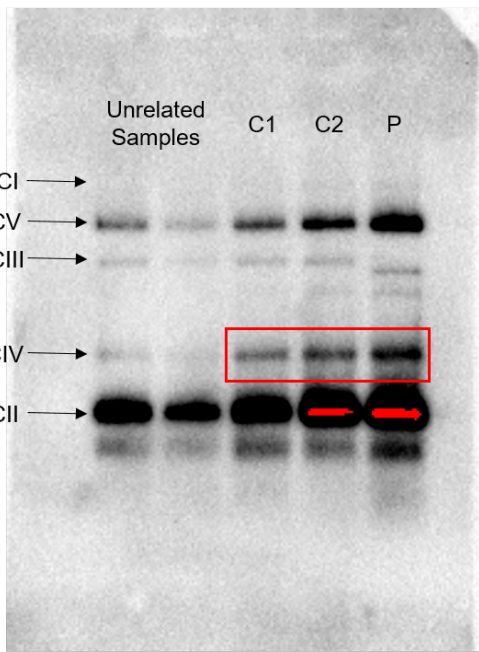

Source Data Figure 3E

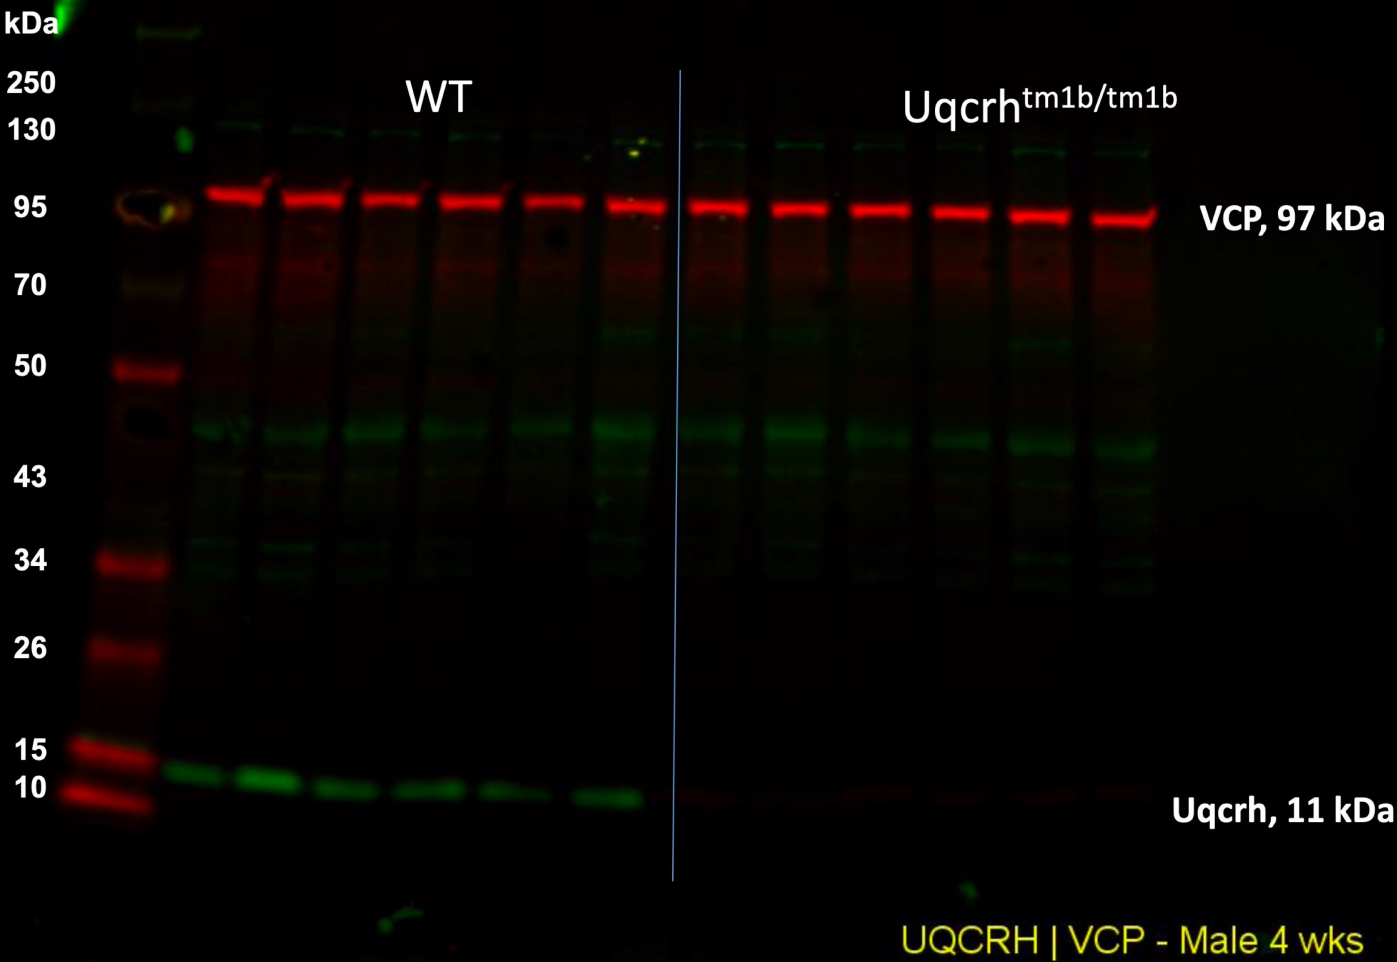

**Source Data Figure 3F,G and Appendix Fig S1**

Heart from *Uqcrc2*<sup>-/-</sup>  
UQCRC2 staining

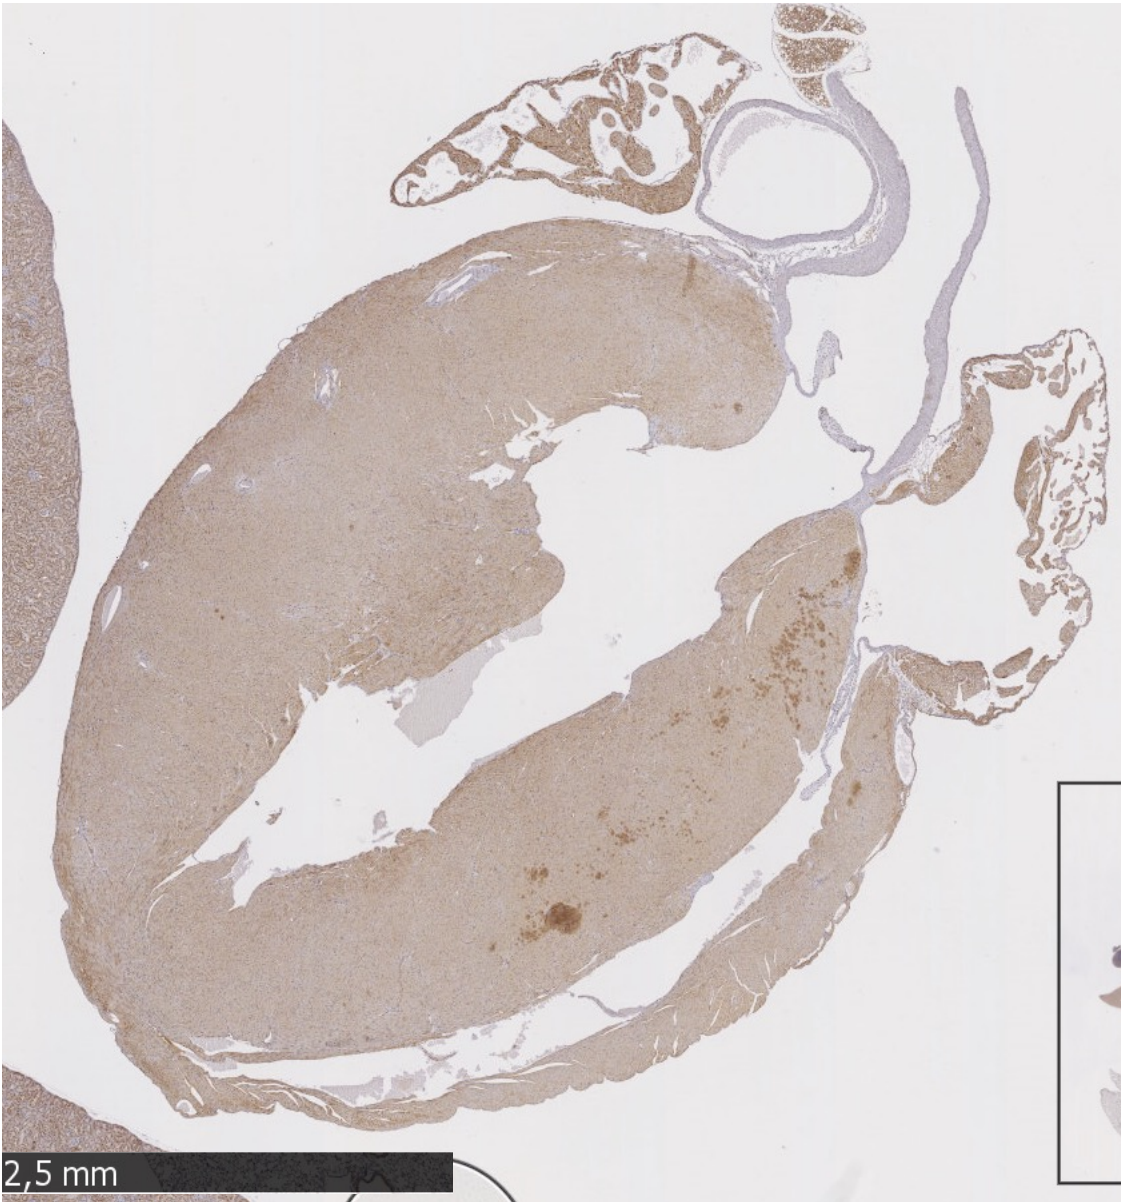

Heart from WT  
UQCRC2 staining

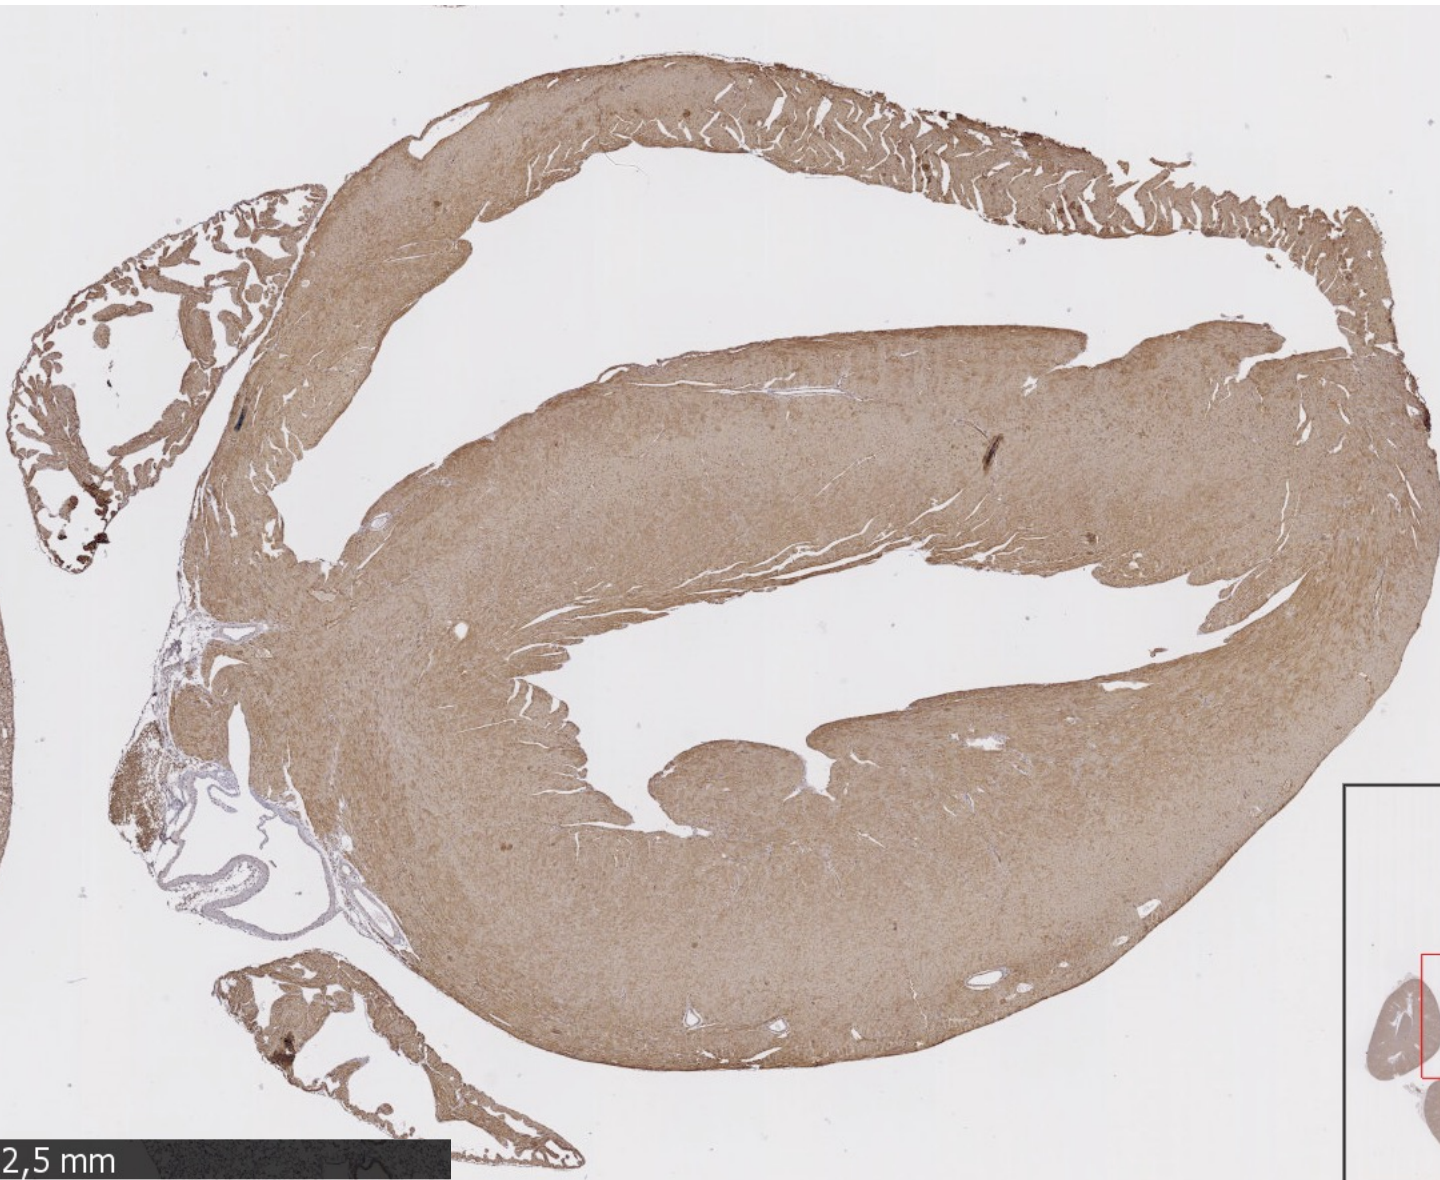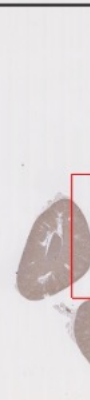

Liver from *Uqcrh*<sup>-/-</sup>  
UQCRC2 staining

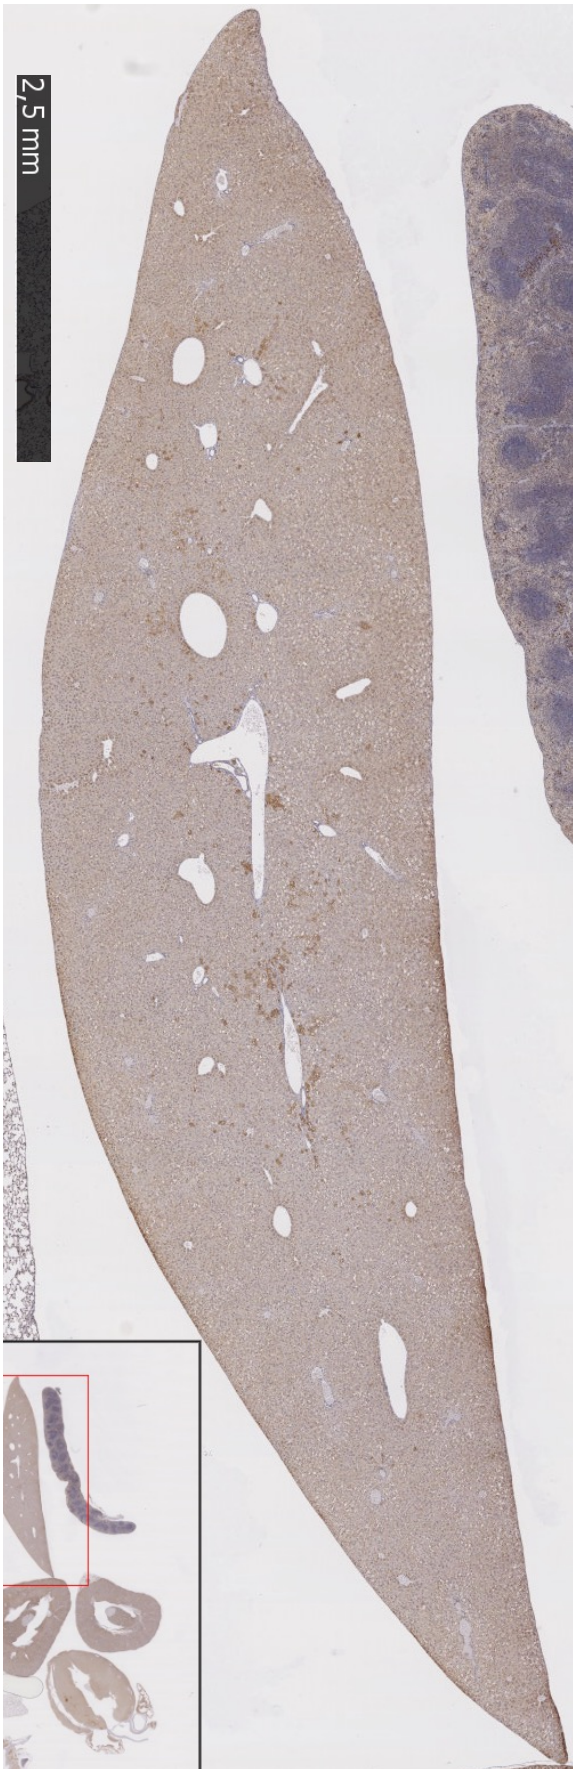

Liver from WT  
UQCRC2 staining

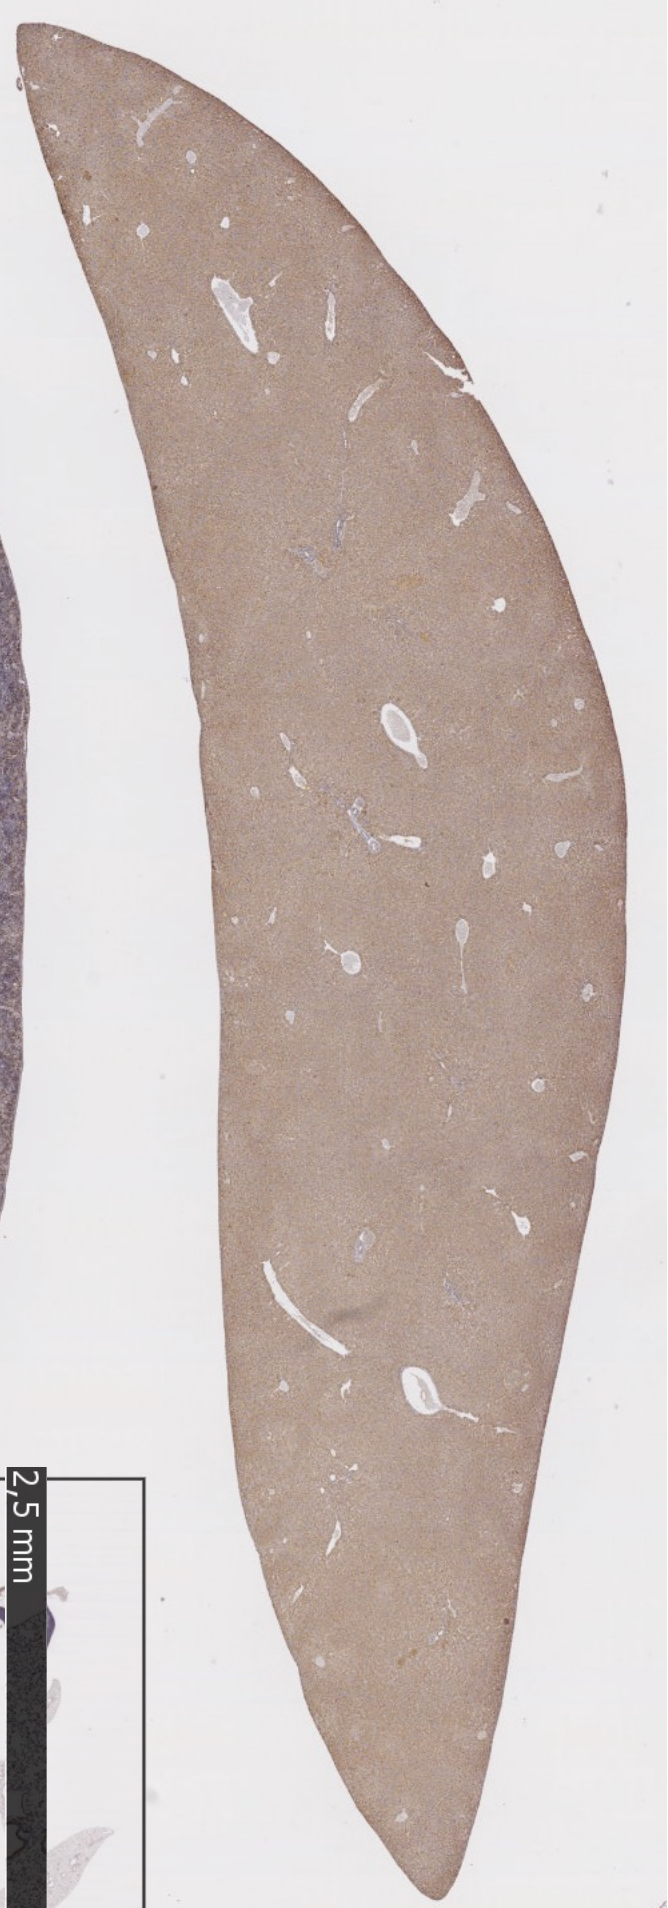

2,5 mm

Kidney from *Uqcrh*<sup>-/-</sup>  
UQCRC2 staining

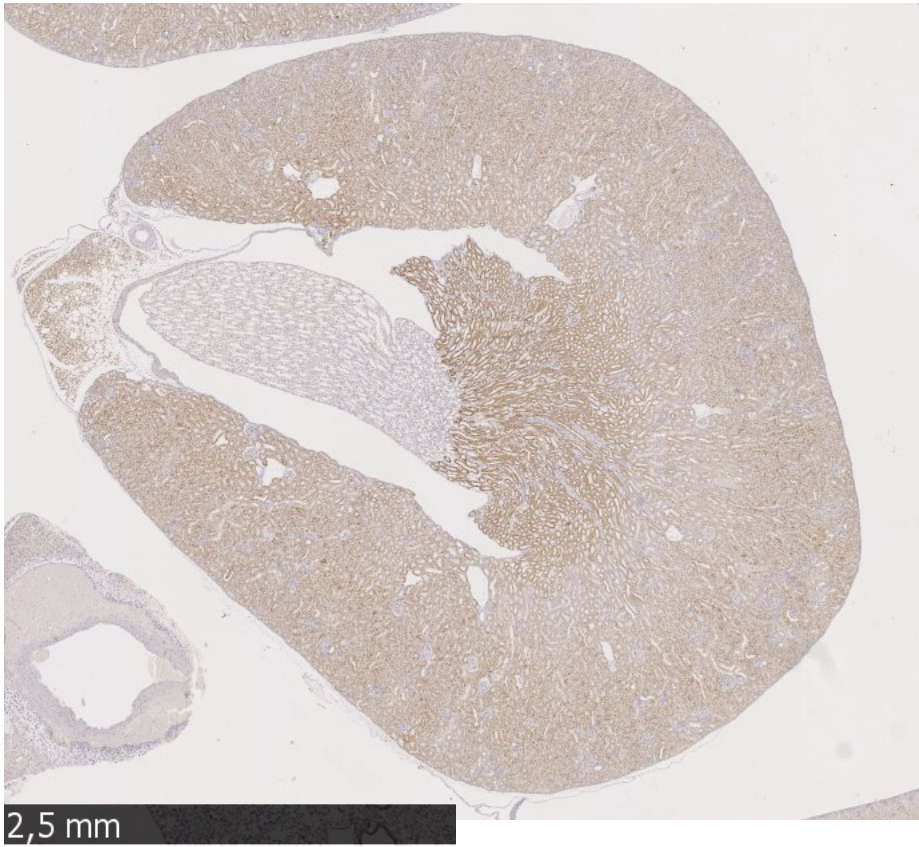



Kidney from WT  
UQCRC2 staining

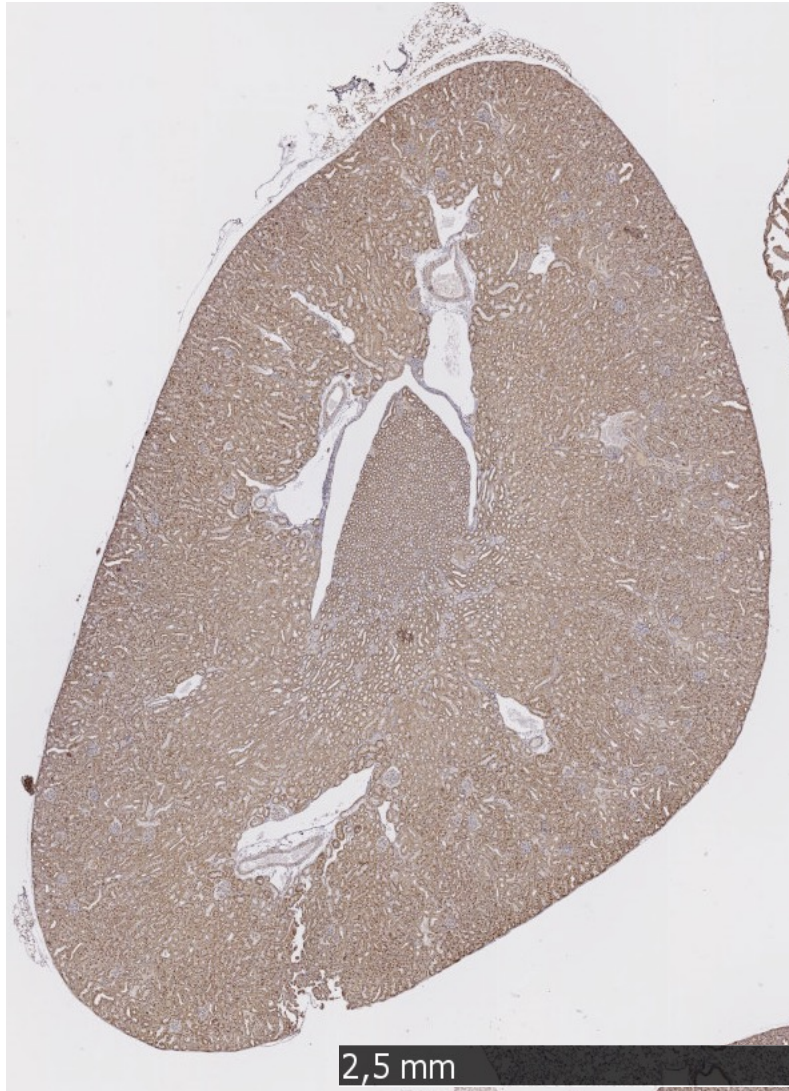

Heart from *Uqcrlh*<sup>-/-</sup>  
VDAC1/Porin staining

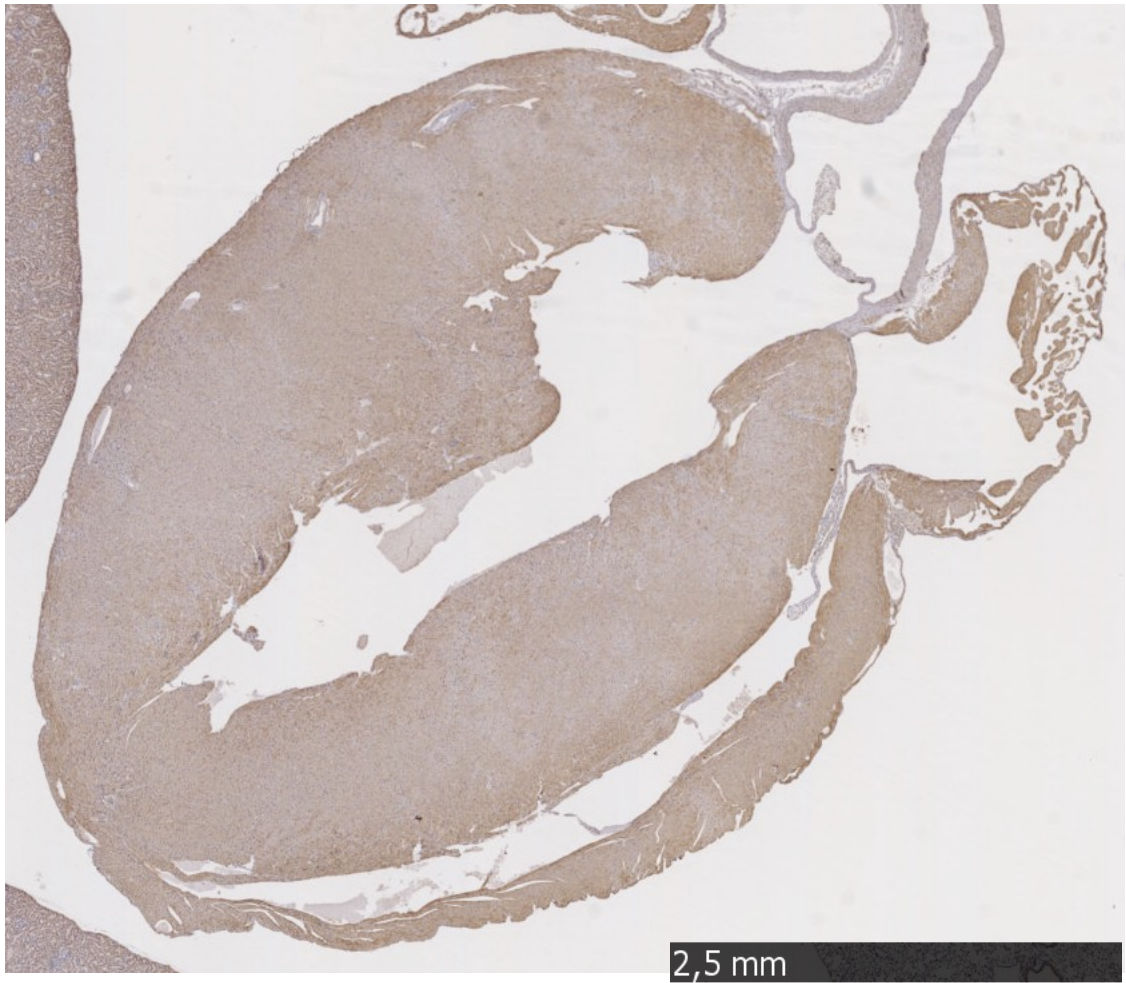

Heart from WT  
VDAC1/Porin staining

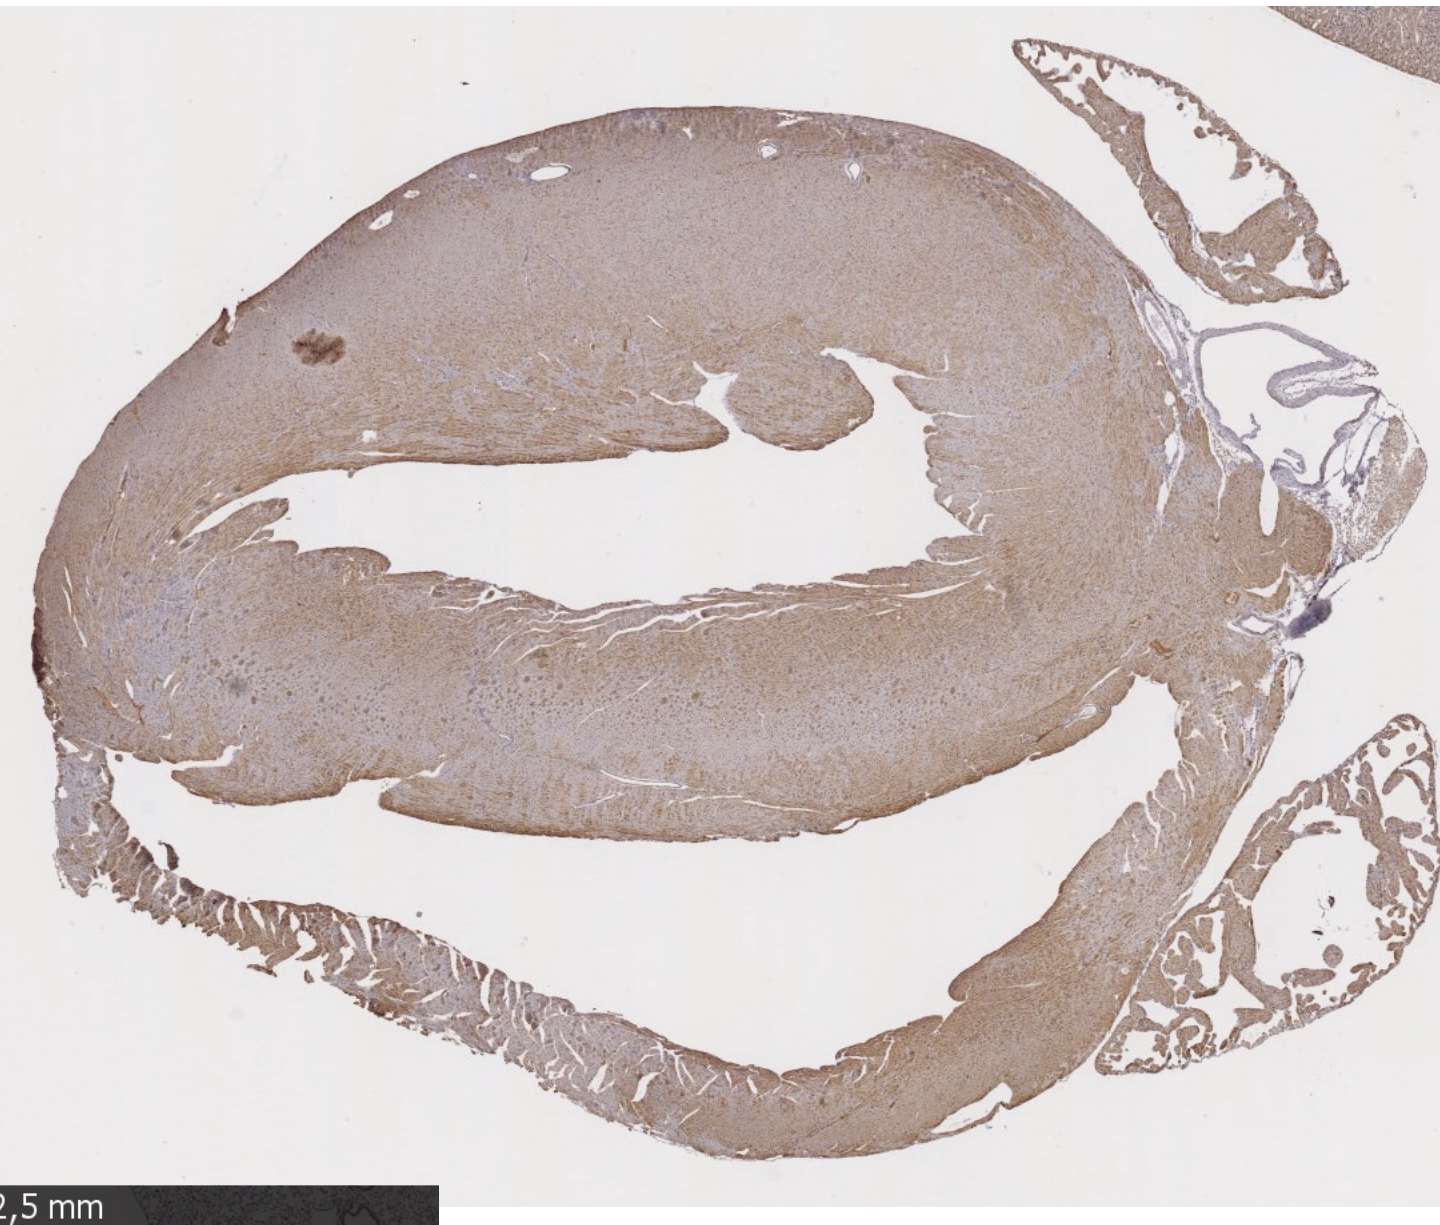

Liver from *Uqcrlh*<sup>-/-</sup>  
VDAC1/Porin staining

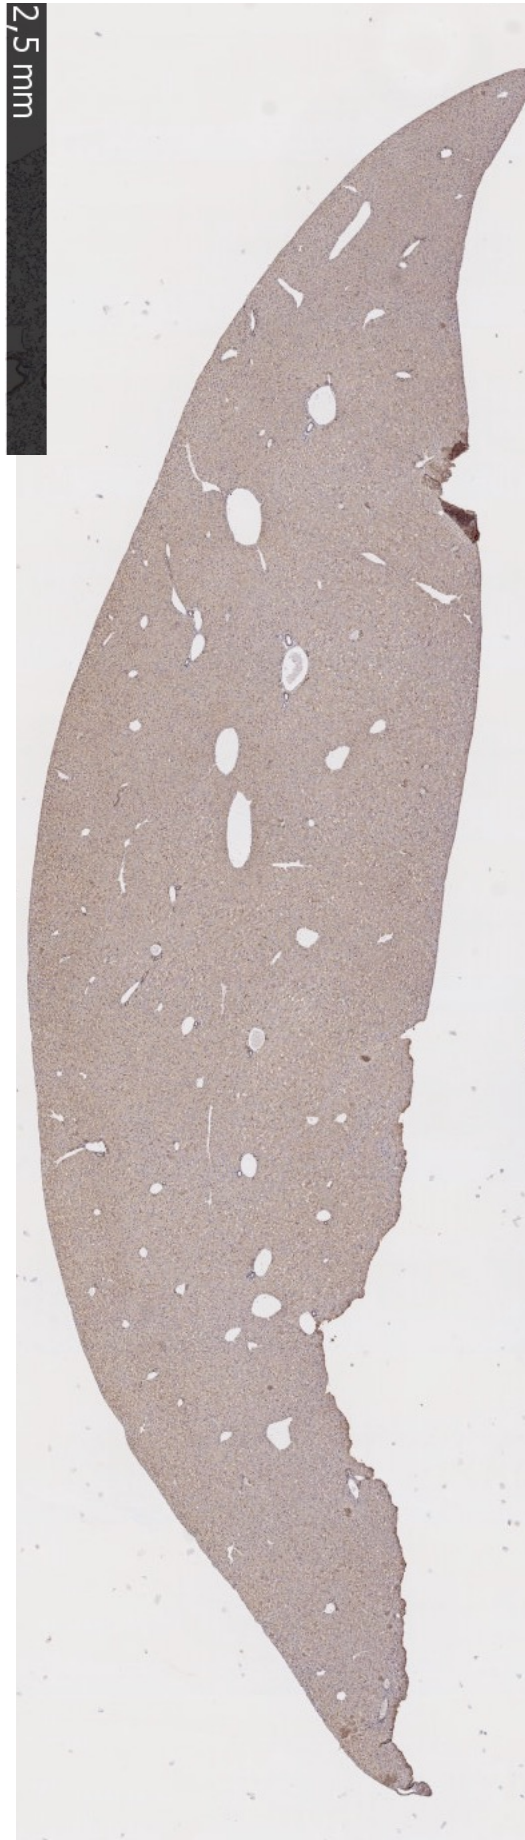

Liver from WT  
UQCRC2 staining

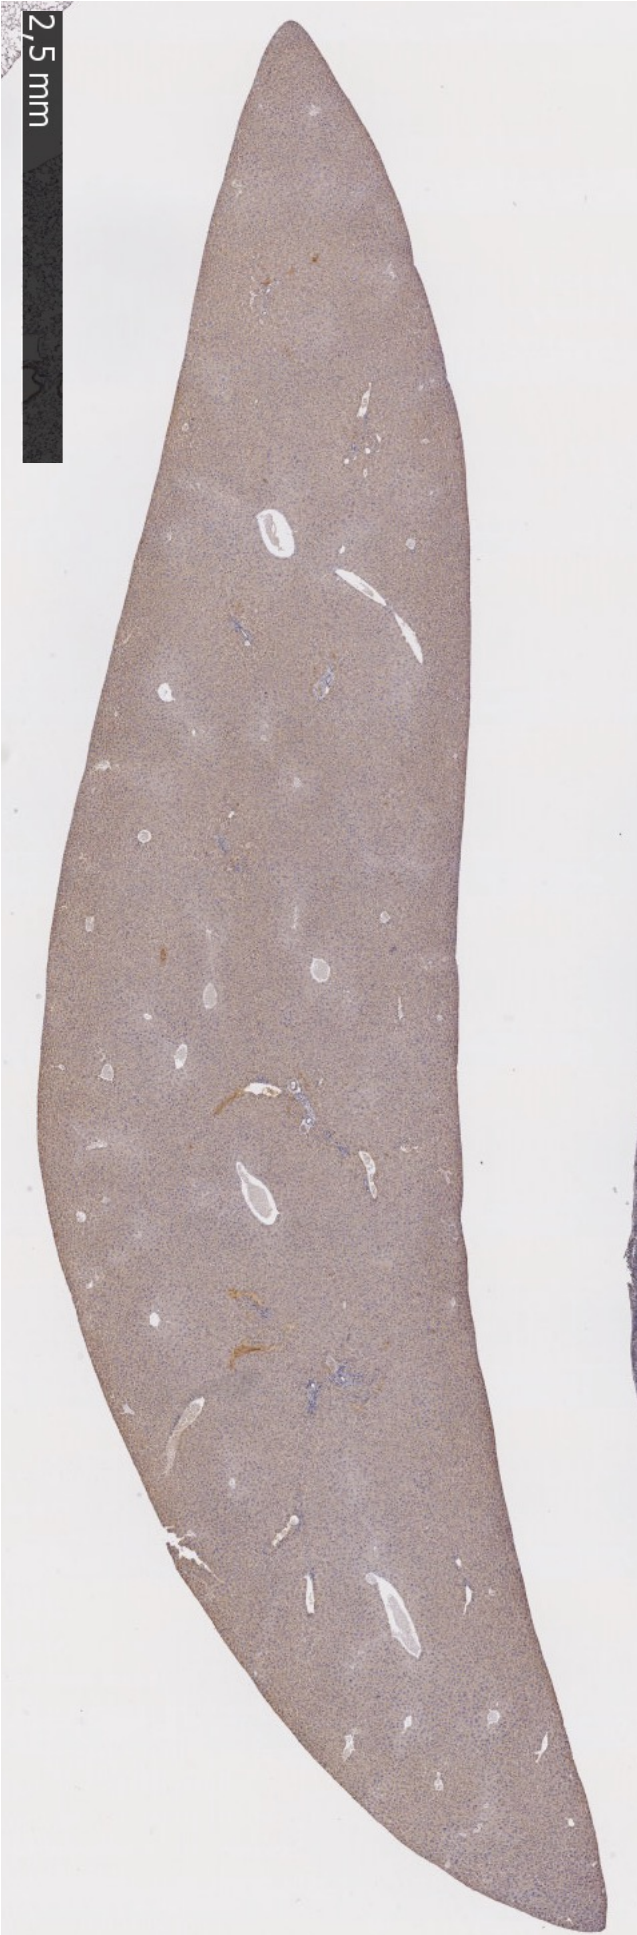

Kidney from *Uqcrlh*<sup>-/-</sup>  
VDAC1/Porin staining

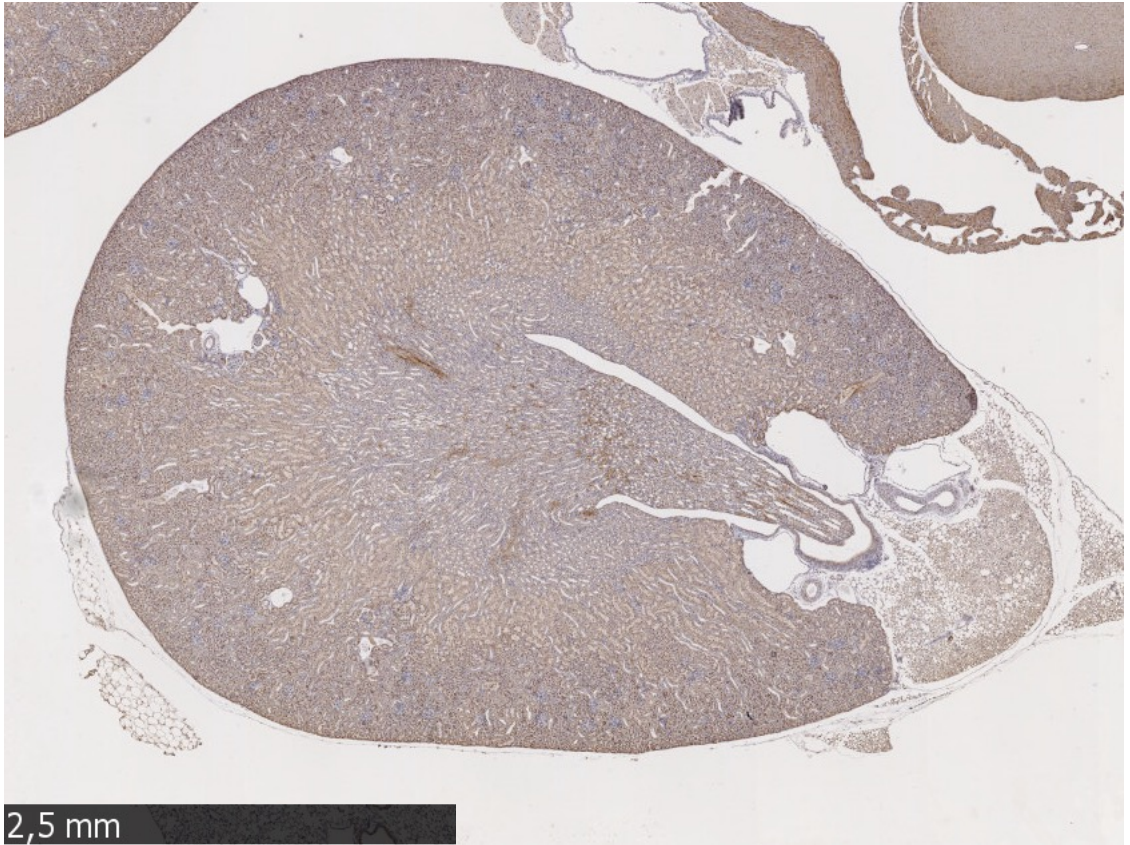

Kidney from WT  
VDAC1/Porin staining

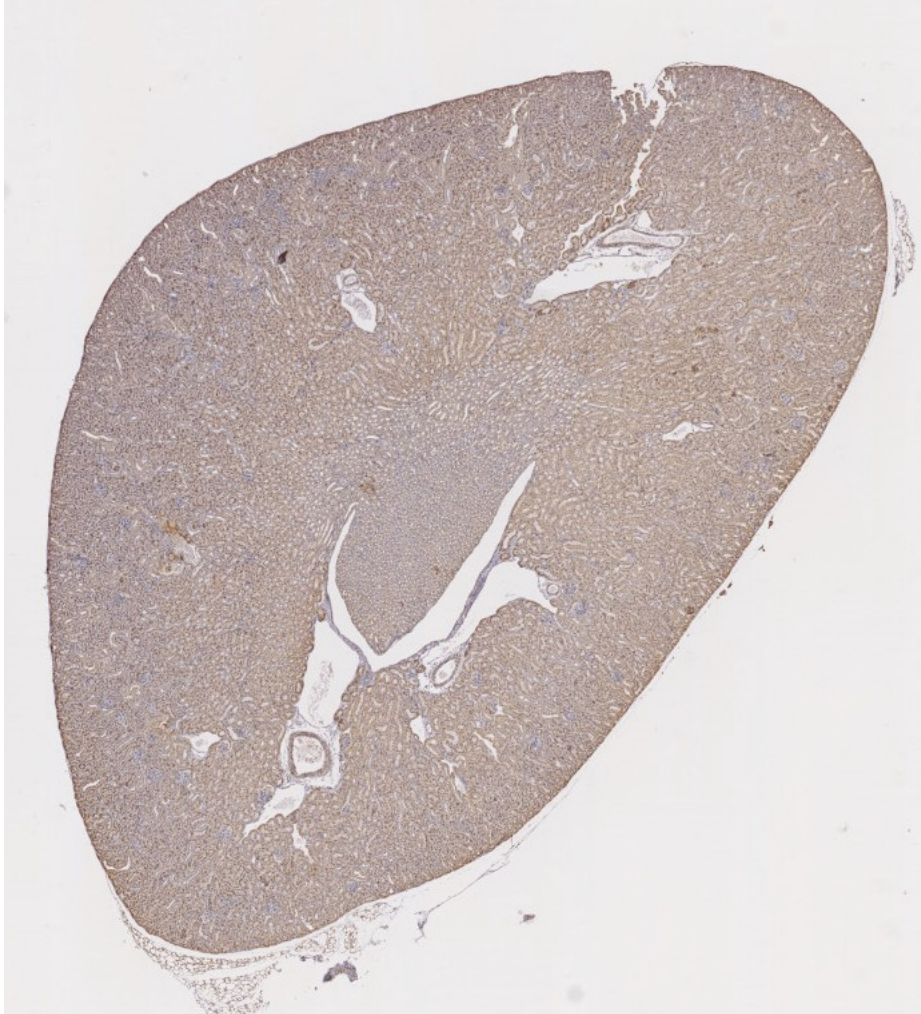

2,5 mm
